# Supplementary material for: Changing shapes and implied viscosities of suspended submicron particles
Source: Copernicus journal article supplement (doi:10.5194/acp-15-7819-2015), 2015-07-16
Supplement: Supplementary file 1 [file acp-15-7819-2015-supplement.zip]

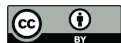

## *Supplement of*

# **Changing shapes and implied viscosities of suspended submicron particles**

**Y. Zhang et al.**

*Correspondence to:* S. T. Martin (scot\_martin@harvard.edu) and F. M. Geiger (geigerf@chem.northwestern.edu)

- acp-15-7819-2015-supplement-cover-letter.pdf
- ParticleShapeAndViscosity\_SI\_Revised
  - Figure\_SI\_Zhang.pdf
  - MovieS1.avi
  - ParticleShapeAndViscosity\_SI\_plain\_text.docx
- \_\_MACOSX
  - ParticleShapeAndViscosity\_SI\_Revised
    - \* .\_Figure\_SI\_Zhang.pdf
    - \* .\_ParticleShapeAndViscosity\_SI\_plain\_text.docx

The copyright of individual parts of the supplement might differ from the CC-BY 3.0 licence.
