# Supplementary material for: Changing shapes and implied viscosities of suspended submicron particles
Source: Copernicus journal article supplement (doi:10.5194/acp-15-7819-2015), 2015-07-16
Supplement: Supplementary file 2 [file acp-15-7819-2015-supplement.zip]

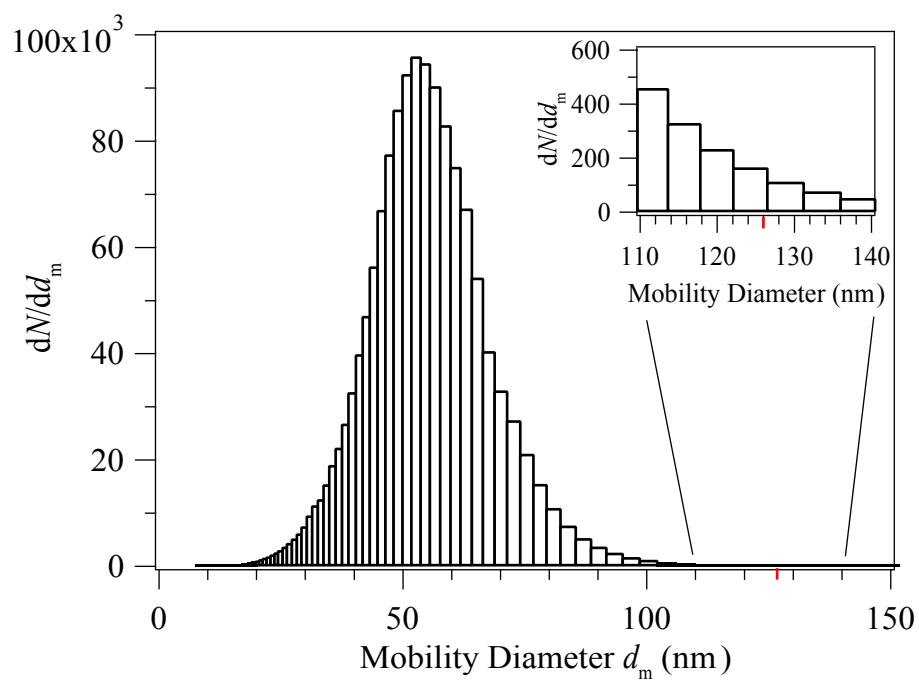

**Figure S1**

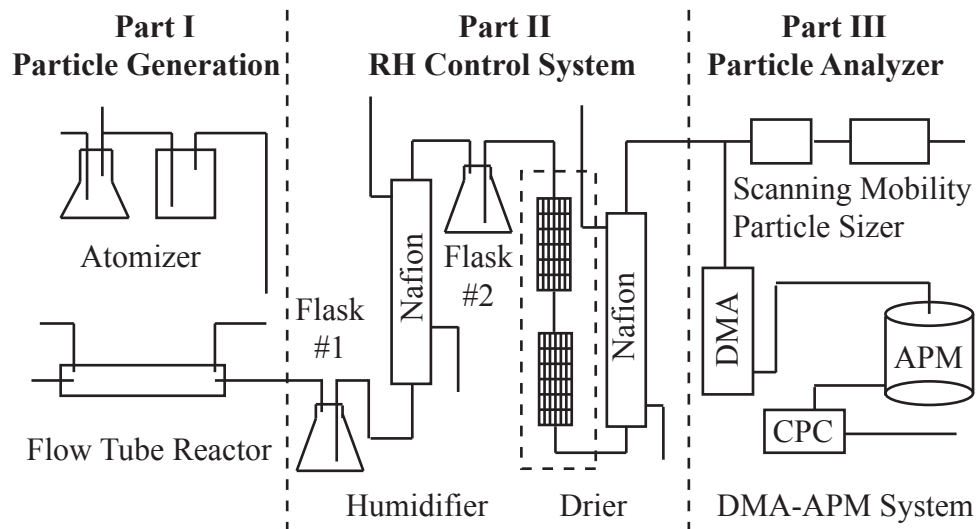

**Figure S2**

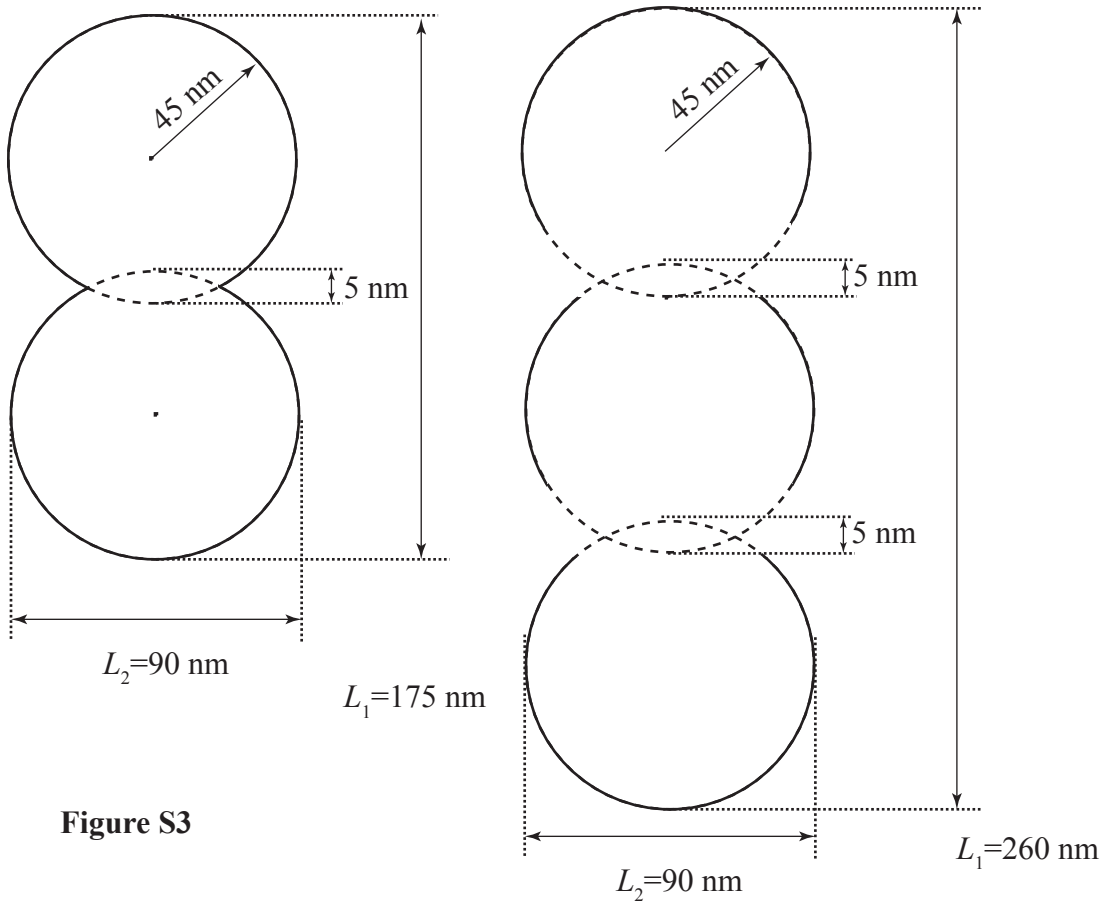

**Figure S3**

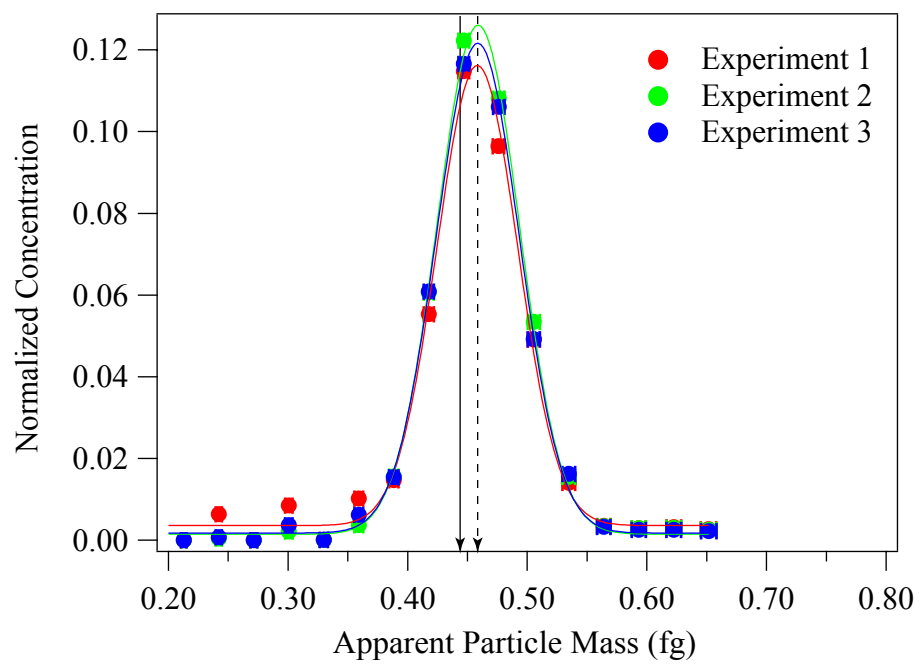

**Figure S4**

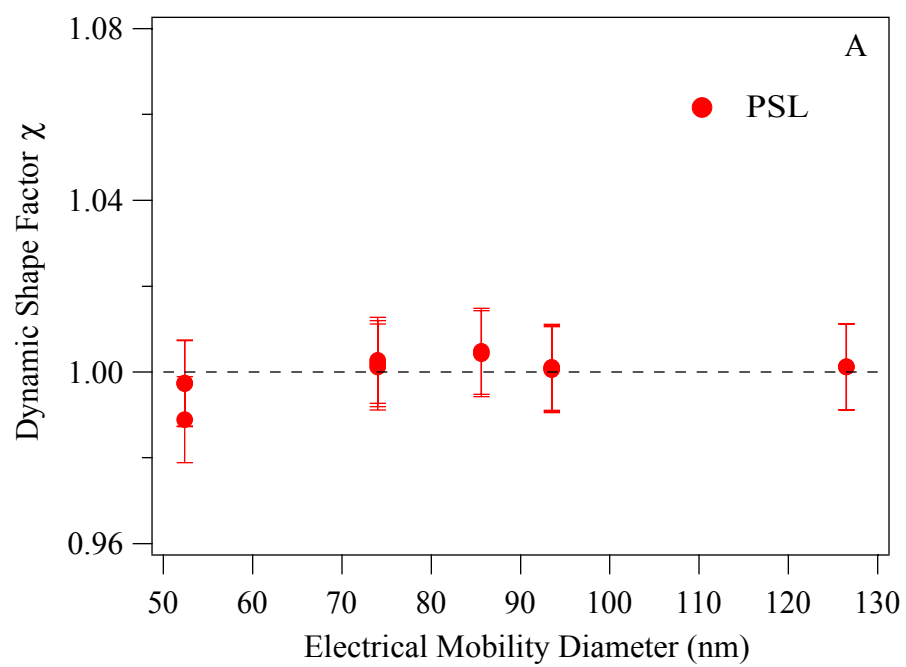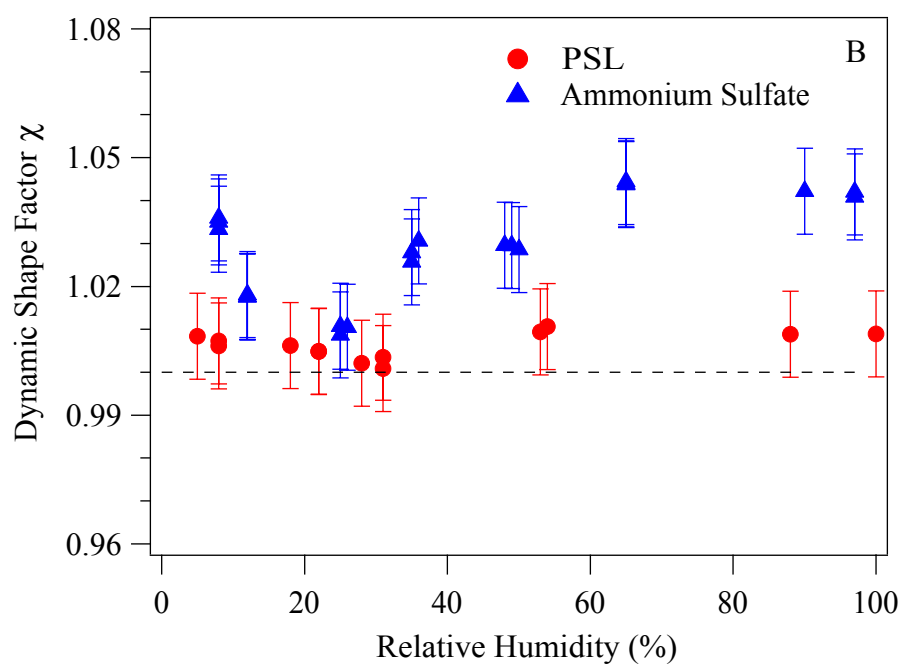

**Figure S5**

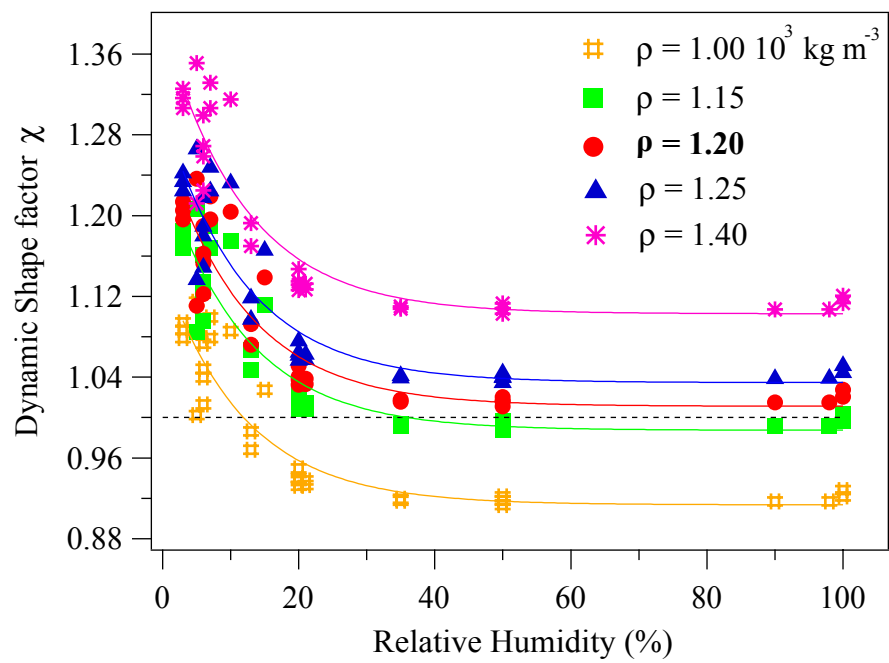

Figure S6

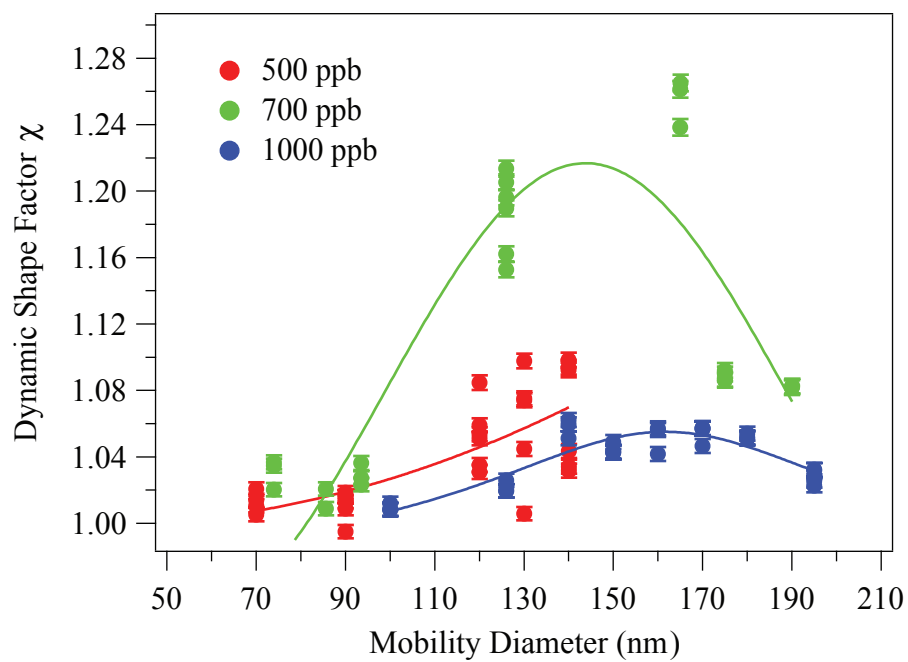

**Figure S7**

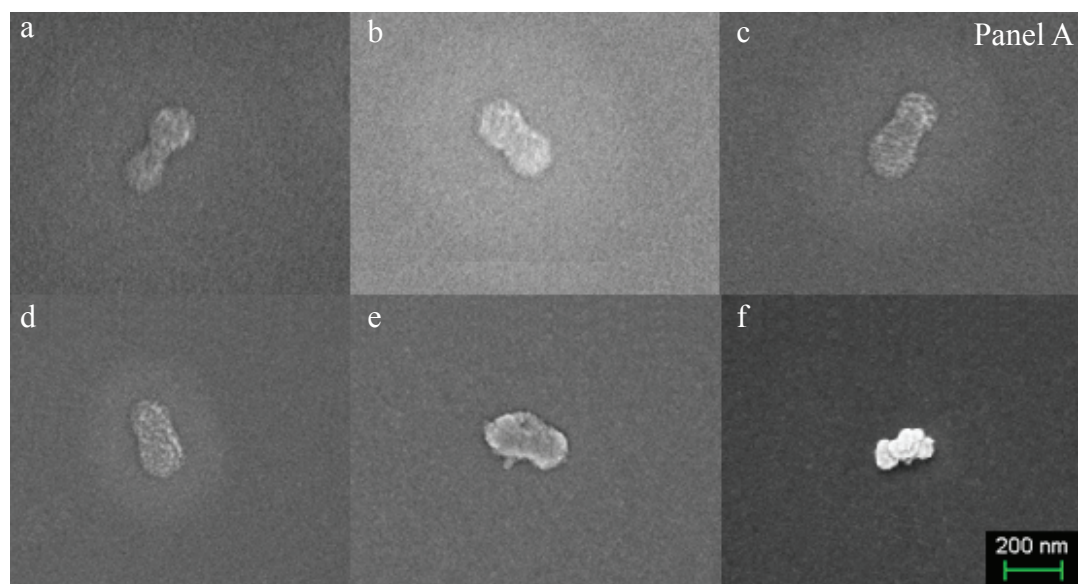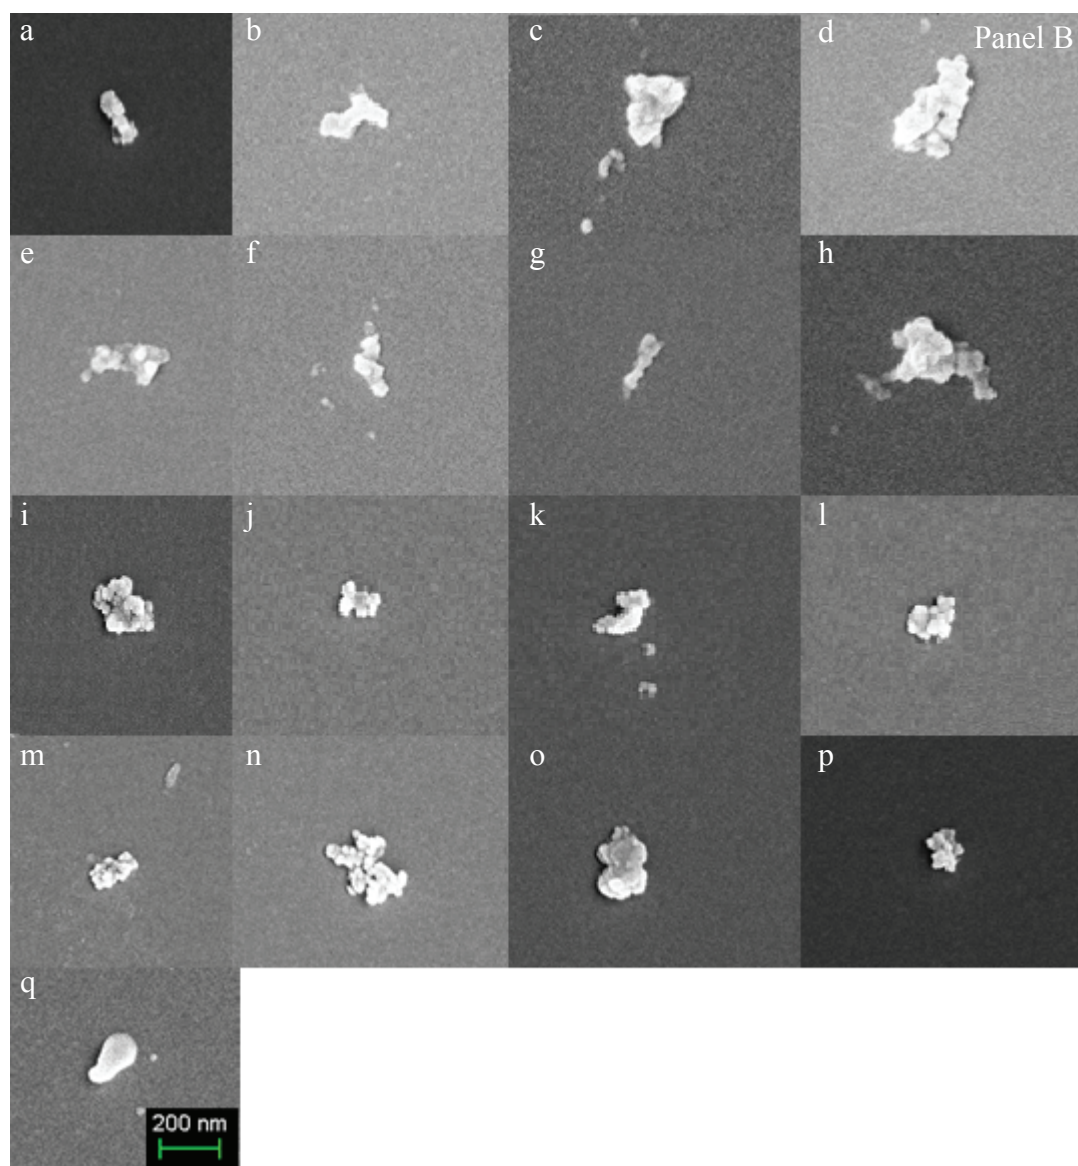

**Figure S8**



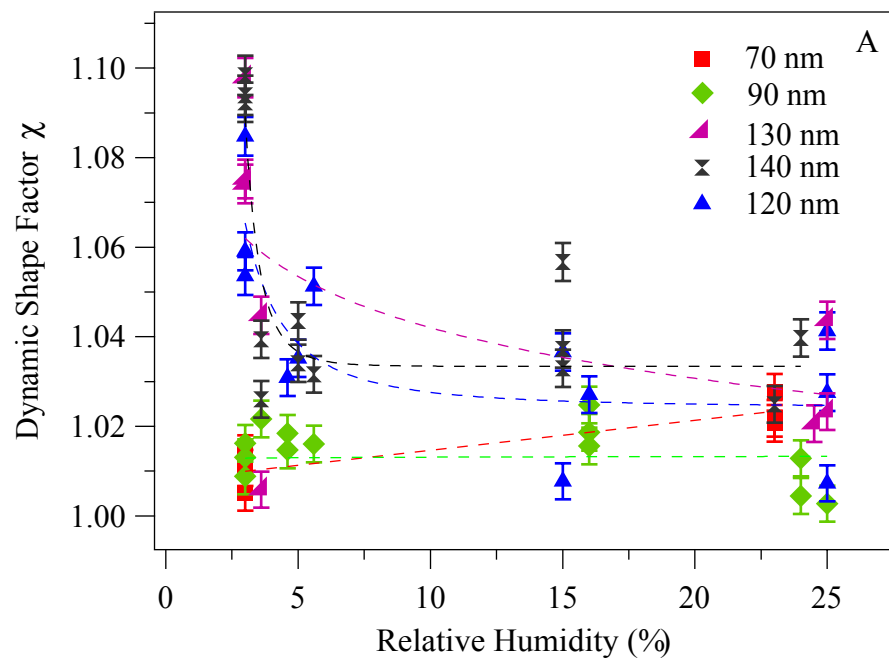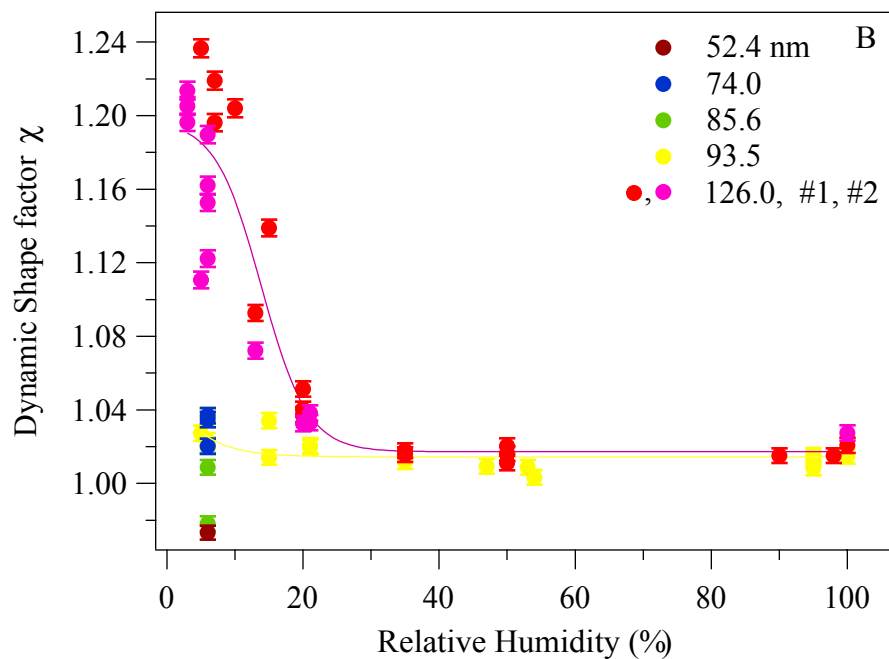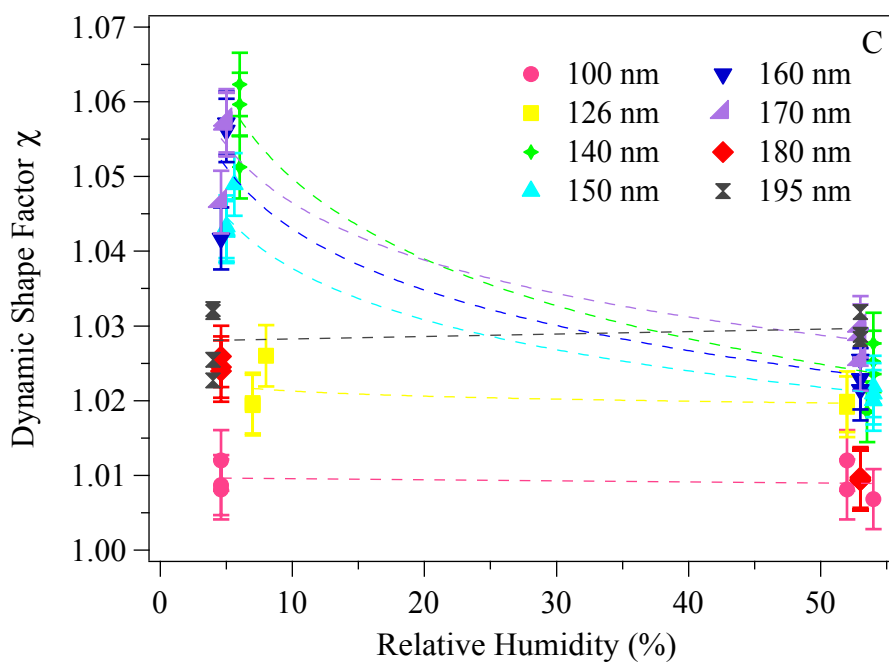

**Figure S9**

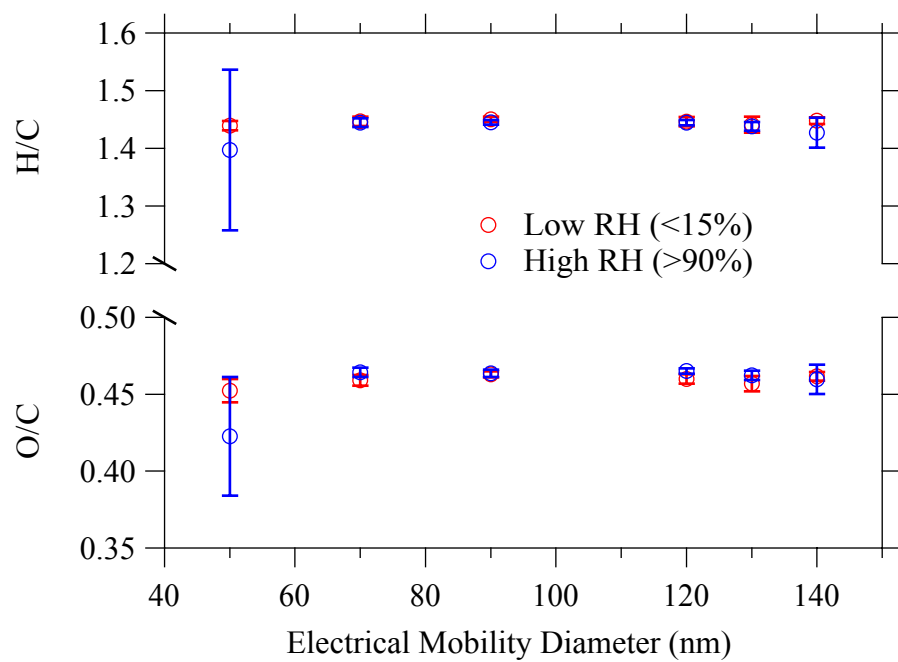

**Figure S10**

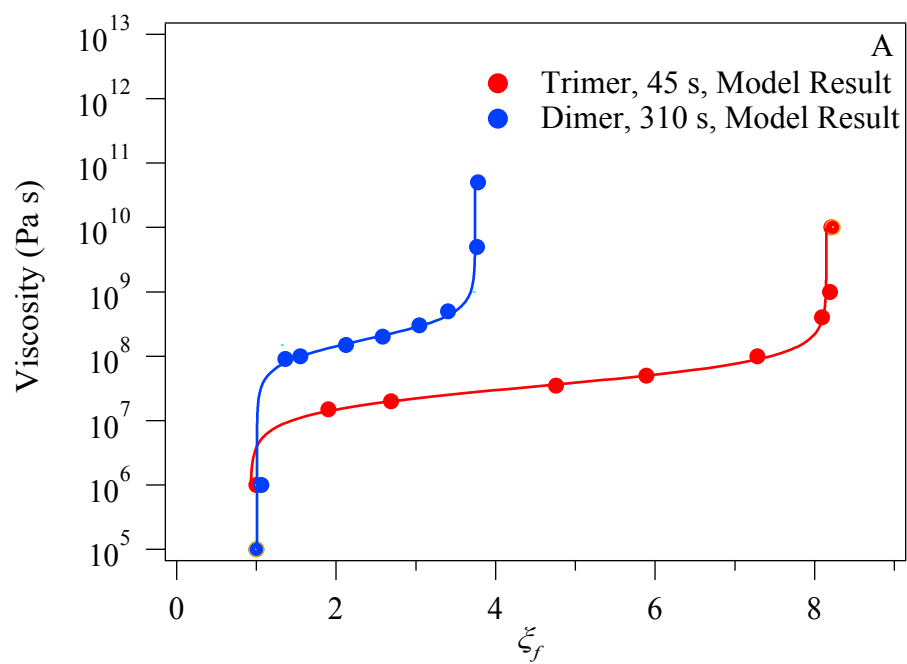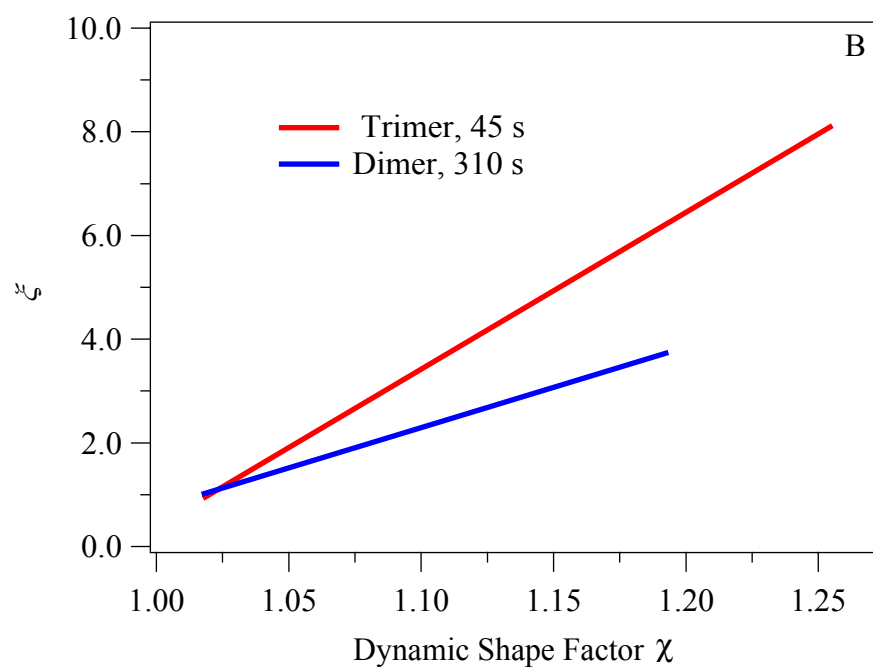

**Figure S11**

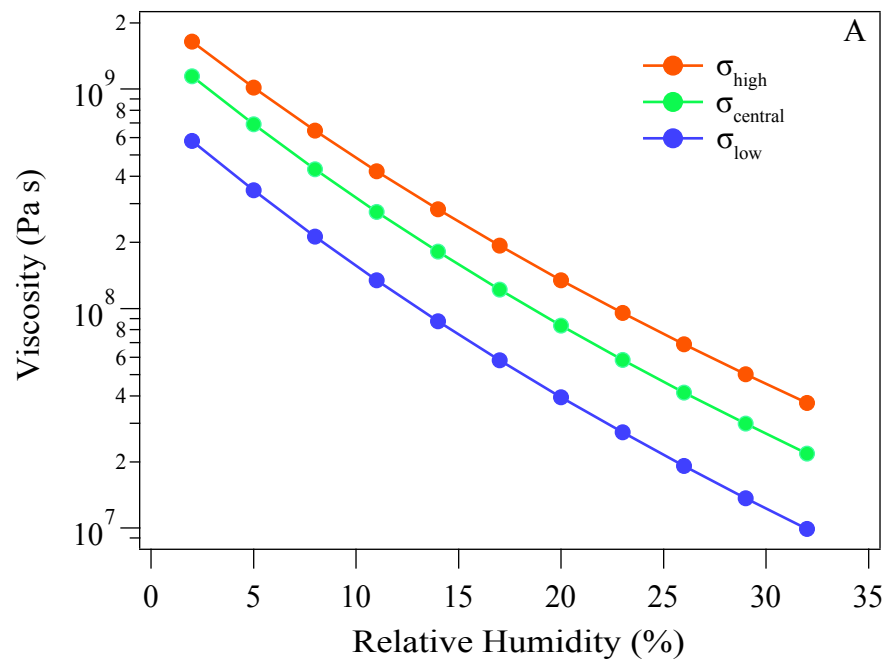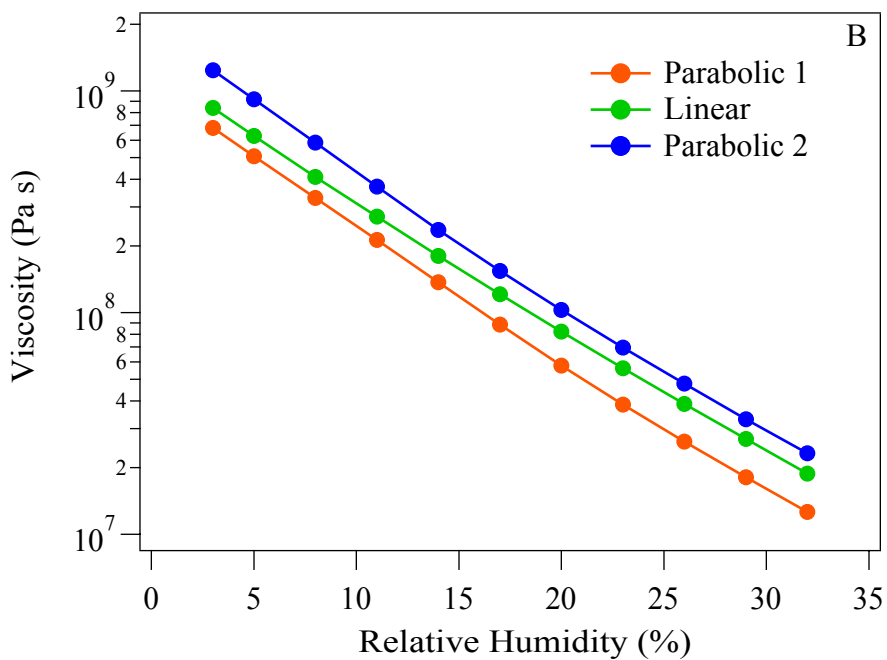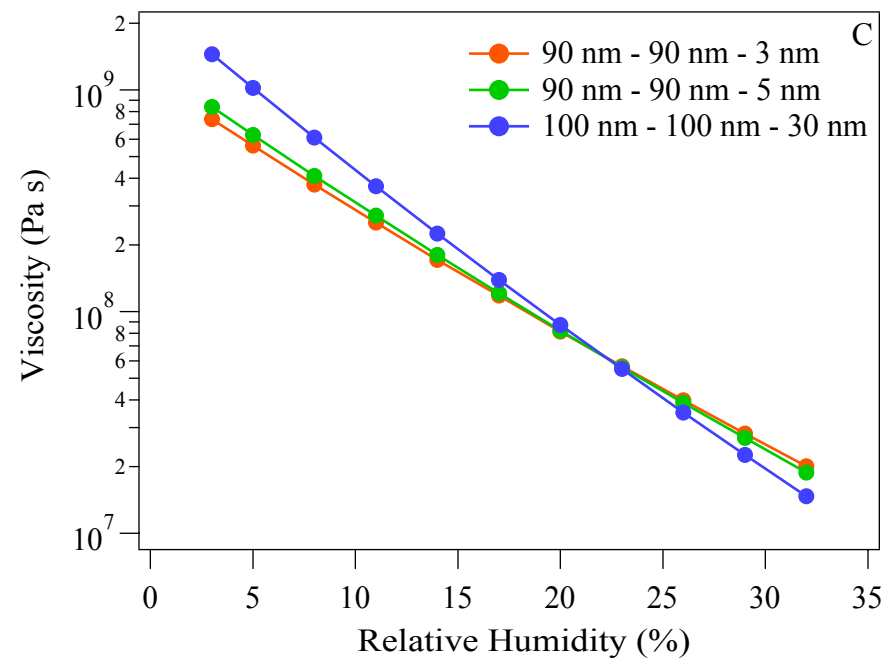

**Figure S12**

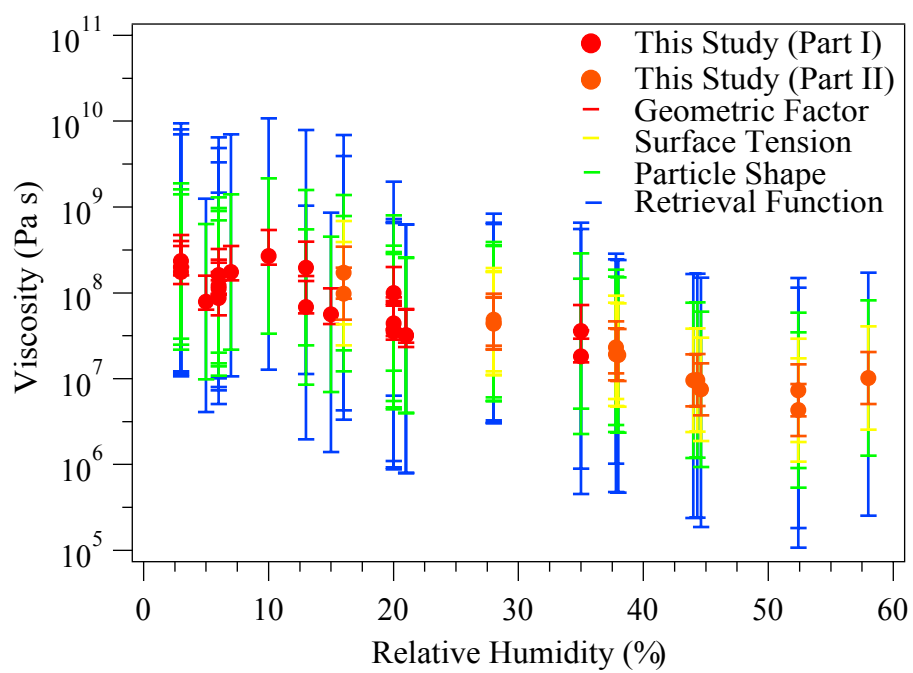

**Figure S13**
